# Supplementary material
Source: publisher site journal article supplement (https://www.dovepress.com/article/612553)
Supplement: Supplementary file 1 [file 612553%20Supplementary%20Materials.pdf]

**Supplementary Table 2.** The raw data of the tria-WES-based genetic results and related clinical manifestations and neurodevelopmental phenotypes of the 38 s-NDDs cases in external validation set-1.

| Genetic results | Sex | Age(y) | GDD/ID severity | ASD | ADHD | EP | Comorbidity condition | ICA | BM | Ocular/visual dysfunctions | Ear anomalies/hearing loss |
|-----------------|-----|--------|-----------------|-----|------|----|-----------------------|-----|----|----------------------------|----------------------------|
| negative        | F   | 3.00   | mild-moderate   | N   | Y    | N  | single                | N   | Y  | N                          | Y                          |
| negative        | F   | 1.00   | mild-moderate   | N   | N    | Y  | single                | N   | N  | N                          | N                          |
| positive        | F   | 1.00   | mild-moderate   | N   | Y    | Y  | single                | N   | N  | N                          | N                          |
| negative        | M   | 5.00   | mild-moderate   | Y   | Y    | N  | single                | N   | Y  | N                          | N                          |
| negative        | M   | 11.81  | mild-moderate   | N   | Y    | N  | single                | N   | N  | N                          | Y                          |
| negative        | M   | 5.00   | mild-moderate   | Y   | N    | N  | single                | N   | N  | N                          | N                          |
| negative        | M   | 12.39  | mild-moderate   | N   | N    | Y  | single                | N   | N  | N                          | N                          |
| negative        | F   | 3.12   | mild-moderate   | Y   | Y    | N  | single                | N   | Y  | N                          | N                          |
| negative        | M   | 8.21   | mild-moderate   | N   | N    | Y  | single                | N   | Y  | N                          | N                          |
| negative        | F   | 14.97  | mild-moderate   | Y   | N    | N  | single                | N   | Y  | N                          | N                          |
| negative        | F   | 1.54   | mild-moderate   | N   | N    | Y  | single                | N   | N  | N                          | N                          |
| negative        | M   | 3.50   | mild-moderate   | N   | Y    | Y  | single                | N   | N  | N                          | N                          |
| negative        | M   | 1.85   | mild-moderate   | Y   | N    | Y  | single                | N   | N  | N                          | N                          |
| negative        | M   | 13.13  | mild-moderate   | N   | N    | Y  | single                | N   | N  | N                          | N                          |
| negative        | F   | 6.27   | mild-moderate   | N   | Y    | Y  | single                | N   | N  | N                          | N                          |
| negative        | M   | 6.82   | mild-moderate   | Y   | N    | N  | single                | N   | N  | N                          | N                          |
| negative        | M   | 2.81   | mild-moderate   | Y   | N    | Y  | multiple              | N   | N  | N                          | N                          |
| positive        | F   | 2.29   | mild-moderate   | N   | N    | Y  | multiple              | N   | Y  | N                          | N                          |
| negative        | F   | 14.68  | mild-moderate   | Y   | N    | N  | single                | Y   | N  | N                          | Y                          |
| positive        | F   | 0.75   | severe-profound | N   | N    | Y  | single                | N   | N  | N                          | N                          |
| negative        | M   | 2.27   | severe-profound | Y   | N    | N  | single                | N   | N  | N                          | N                          |
| negative        | M   | 1.33   | severe-profound | N   | N    | Y  | single                | N   | Y  | N                          | N                          |
| positive        | M   | 3.28   | severe-profound | Y   | N    | N  | single                | N   | Y  | N                          | N                          |
| positive        | F   | 11.05  | severe-profound | N   | N    | Y  | multiple              | N   | N  | N                          | N                          |
| positive        | M   | 0.80   | severe-profound | N   | N    | Y  | multiple              | N   | N  | N                          | N                          |
| positive        | M   | 4.48   | severe-profound | Y   | N    | N  | single                | Y   | Y  | N                          | N                          |
| positive        | M   | 8.10   | severe-profound | N   | Y    | N  | single                | Y   | N  | N                          | N                          |
| positive        | M   | 0.52   | severe-profound | N   | N    | Y  | single                | Y   | Y  | N                          | N                          |
| positive        | F   | 4.98   | severe-profound | Y   | N    | Y  | single                | Y   | Y  | N                          | N                          |
| positive        | F   | 2.49   | severe-profound | N   | N    | Y  | single                | Y   | N  | N                          | N                          |
| positive        | F   | 7.48   | severe-profound | Y   | N    | Y  | single                | Y   | Y  | N                          | N                          |
| positive        | F   | 0.80   | severe-profound | N   | N    | Y  | multiple              | Y   | Y  | N                          | N                          |
| positive        | M   | 0.76   | severe-profound | N   | N    | Y  | multiple              | Y   | N  | N                          | N                          |
| positive        | F   | 10.95  | severe-profound | Y   | Y    | N  | multiple              | Y   | N  | N                          | Y                          |
| positive        | M   | 2.00   | severe-profound | Y   | N    | N  | multiple              | Y   | Y  | N                          | N                          |
| positive        | M   | 6.60   | severe-profound | Y   | N    | Y  | multiple              | Y   | N  | N                          | N                          |
| positive        | F   | 0.88   | severe-profound | N   | N    | Y  | multiple              | Y   | N  | N                          | N                          |
| positive        | M   | 13.58  | severe-profound | N   | N    | Y  | multiple              | Y   | N  | N                          | N                          |

Abbreviations: s-NDDs, severe developmental disorders; GDD/ID, global developmental delay/intellectual disability; ASD, autism spectrum disorder; ADHD, attention deficit hyperactivity; EP, epilepsy; ICA, head circumference abnormality; BM, brain malformation. Note: (1) M, male; F, female. (2) "Y" means "obvious abnormality on the clinical assessment", "N" means "no abnormality on the clinical assessment". (3) "single" means "only existing one type of neurodevelopmental comorbidity (ASD or ADHD or EP) in s-NDDs individuals", "multiple" means "existing two or three types of neurodevelopmental comorbidity (ASD or ADHD or EP) in s-NDDs subjects". (4) "positive" means patients with pathogenic/likely pathogenic variants detected by tria-WES; "negative" means patients with benign/intermediate significance variants detected by tria-WES.

| Supplementary Table 2: The raw data of the sex-WES-based genetic results and related clinical manifestations and neurodevelopmental phenotypes of the 97 s-NDDs patients in external validation set 2 |     |        |                 |     |      |    |                       |     |    |                           |                            |
|-------------------------------------------------------------------------------------------------------------------------------------------------------------------------------------------------------|-----|--------|-----------------|-----|------|----|-----------------------|-----|----|---------------------------|----------------------------|
| Genetic results                                                                                                                                                                                       | Sex | Age(y) | GDH ID severity | ASD | ADHD | EP | Comorbidity condition | HCA | BM | Ocular/visual dysfunction | Ear anomalies/hearing loss |
| positive                                                                                                                                                                                              | M   | 11.00  | mild-moderate   | N   | N    | Y  | multiple              | Y   | N  | N                         | N                          |
| negative                                                                                                                                                                                              | M   | 9.00   | mild-moderate   | Y   | Y    | N  | single                | N   | N  | N                         | N                          |
| positive                                                                                                                                                                                              | F   | 7.00   | severe-profound | Y   | Y    | N  | multiple              | N   | N  | N                         | N                          |
| positive                                                                                                                                                                                              | F   | 2.50   | severe-profound | Y   | N    | Y  | single                | Y   | Y  | N                         | N                          |
| negative                                                                                                                                                                                              | M   | 3.08   | mild-moderate   | N   | N    | Y  | single                | N   | N  | N                         | N                          |
| negative                                                                                                                                                                                              | M   | 5.75   | mild-moderate   | N   | N    | Y  | single                | Y   | N  | N                         | N                          |
| positive                                                                                                                                                                                              | M   | 6.58   | mild-moderate   | Y   | N    | N  | single                | N   | Y  | Y                         | N                          |
| positive                                                                                                                                                                                              | M   | 6.50   | mild-moderate   | N   | N    | Y  | single                | Y   | Y  | N                         | N                          |
| negative                                                                                                                                                                                              | M   | 8.00   | mild-moderate   | N   | N    | Y  | single                | N   | N  | N                         | N                          |
| negative                                                                                                                                                                                              | M   | 6.50   | mild-moderate   | N   | N    | Y  | single                | Y   | Y  | N                         | N                          |
| negative                                                                                                                                                                                              | M   | 2.17   | mild-moderate   | Y   | N    | N  | single                | Y   | N  | N                         | N                          |
| positive                                                                                                                                                                                              | M   | 6.08   | severe-profound | Y   | Y    | Y  | multiple              | Y   | Y  | N                         | N                          |
| positive                                                                                                                                                                                              | M   | 3.5    | severe-profound | Y   | N    | N  | multiple              | Y   | N  | N                         | N                          |
| positive                                                                                                                                                                                              | M   | 7      | severe-profound | Y   | Y    | N  | multiple              | Y   | N  | N                         | N                          |
| negative                                                                                                                                                                                              | M   | 8      | mild-moderate   | Y   | Y    | N  | multiple              | N   | N  | N                         | N                          |
| negative                                                                                                                                                                                              | M   | 4.25   | mild-moderate   | N   | N    | Y  | single                | N   | N  | N                         | N                          |
| negative                                                                                                                                                                                              | M   | 1.5    | mild-moderate   | N   | Y    | N  | single                | N   | N  | N                         | N                          |
| negative                                                                                                                                                                                              | F   | 2.08   | mild-moderate   | Y   | N    | N  | single                | N   | N  | N                         | N                          |
| negative                                                                                                                                                                                              | M   | 8      | mild-moderate   | N   | N    | Y  | single                | N   | N  | N                         | N                          |
| negative                                                                                                                                                                                              | F   | 0.3    | mild-moderate   | N   | N    | Y  | single                | Y   | N  | N                         | N                          |
| negative                                                                                                                                                                                              | F   | 5      | mild-moderate   | N   | Y    | N  | single                | N   | N  | N                         | N                          |
| positive                                                                                                                                                                                              | F   | 3.5    | severe-profound | Y   | N    | N  | single                | Y   | Y  | N                         | N                          |
| negative                                                                                                                                                                                              | M   | 8      | mild-moderate   | N   | Y    | N  | single                | N   | N  | N                         | N                          |
| negative                                                                                                                                                                                              | F   | 6.5    | mild-moderate   | N   | N    | Y  | single                | N   | Y  | N                         | N                          |
| positive                                                                                                                                                                                              | M   | 12.00  | severe-profound | Y   | N    | Y  | single                | N   | Y  | N                         | Y                          |
| positive                                                                                                                                                                                              | F   | 10.00  | mild-moderate   | Y   | N    | Y  | multiple              | N   | N  | N                         | N                          |
| positive                                                                                                                                                                                              | F   | 9.00   | severe-profound | Y   | N    | N  | single                | N   | Y  | N                         | Y                          |
| positive                                                                                                                                                                                              | F   | 1.17   | severe-profound | N   | N    | Y  | single                | N   | Y  | N                         | N                          |
| positive                                                                                                                                                                                              | F   | 6.50   | severe-profound | Y   | Y    | N  | multiple              | N   | N  | N                         | N                          |
| negative                                                                                                                                                                                              | M   | 11     | mild-moderate   | N   | N    | Y  | single                | N   | N  | N                         | N                          |
| negative                                                                                                                                                                                              | M   | 5.75   | mild-moderate   | N   | N    | Y  | single                | N   | Y  | N                         | N                          |
| negative                                                                                                                                                                                              | M   | 1.17   | mild-moderate   | N   | N    | Y  | single                | N   | N  | N                         | N                          |
| positive                                                                                                                                                                                              | M   | 7      | severe-profound | Y   | N    | N  | single                | N   | N  | N                         | N                          |
| negative                                                                                                                                                                                              | M   | 3.50   | mild-moderate   | Y   | N    | N  | single                | N   | N  | N                         | N                          |
| positive                                                                                                                                                                                              | M   | 5.08   | severe-profound | Y   | N    | Y  | multiple              | Y   | N  | Y                         | N                          |
| negative                                                                                                                                                                                              | M   | 3.83   | mild-moderate   | N   | N    | Y  | single                | N   | Y  | N                         | Y                          |
| negative                                                                                                                                                                                              | F   | 1.25   | mild-moderate   | N   | N    | Y  | single                | N   | Y  | N                         | N                          |
| negative                                                                                                                                                                                              | M   | 2.83   | mild-moderate   | N   | N    | Y  | single                | N   | Y  | N                         | N                          |
| positive                                                                                                                                                                                              | M   | 1.50   | severe-profound | Y   | N    | Y  | single                | Y   | Y  | N                         | N                          |
| positive                                                                                                                                                                                              | F   | 2.83   | severe-profound | Y   | N    | Y  | multiple              | Y   | Y  | N                         | N                          |
| positive                                                                                                                                                                                              | M   | 2.83   | severe-profound | Y   | Y    | N  | multiple              | Y   | Y  | N                         | Y                          |
| positive                                                                                                                                                                                              | M   | 2.00   | severe-profound | Y   | Y    | N  | multiple              | Y   | N  | N                         | N                          |
| negative                                                                                                                                                                                              | F   | 1.00   | mild-moderate   | N   | Y    | N  | single                | N   | N  | N                         | N                          |
| positive                                                                                                                                                                                              | M   | 5.92   | severe-profound | Y   | N    | Y  | multiple              | Y   | Y  | N                         | N                          |
| negative                                                                                                                                                                                              | M   | 1.92   | mild-moderate   | N   | N    | Y  | single                | N   | N  | N                         | N                          |
| negative                                                                                                                                                                                              | M   | 1.92   | mild-moderate   | N   | Y    | N  | single                | N   | N  | N                         | N                          |
| positive                                                                                                                                                                                              | F   | 10.00  | severe-profound | N   | Y    | N  | single                | N   | Y  | N                         | N                          |
| negative                                                                                                                                                                                              | M   | 13     | mild-moderate   | N   | N    | Y  | single                | N   | N  | N                         | N                          |
| negative                                                                                                                                                                                              | M   | 6.75   | mild-moderate   | N   | Y    | N  | single                | N   | N  | N                         | N                          |
| negative                                                                                                                                                                                              | F   | 10     | mild-moderate   | N   | N    | N  | single                | N   | N  | N                         | N                          |
| positive                                                                                                                                                                                              | H   | 7.25   | severe-profound | Y   | N    | N  | multiple              | N   | N  | N                         | N                          |
| positive                                                                                                                                                                                              | F   | 4.42   | severe-profound | Y   | Y    | N  | multiple              | Y   | N  | Y                         | N                          |
| positive                                                                                                                                                                                              | M   | 7.25   | severe-profound | Y   | Y    | N  | multiple              | Y   | N  | Y                         | N                          |
| positive                                                                                                                                                                                              | H   | 2.00   | severe-profound | Y   | Y    | N  | multiple              | N   | N  | N                         | N                          |
| positive                                                                                                                                                                                              | H   | 4.83   | severe-profound | Y   | N    | Y  | multiple              | N   | N  | N                         | N                          |
| positive                                                                                                                                                                                              | H   | 6.00   | severe-profound | Y   | Y    | Y  | multiple              | N   | Y  | Y                         | N                          |
| negative                                                                                                                                                                                              | H   | 3.50   | mild-moderate   | Y   | N    | N  | single                | N   | N  | N                         | N                          |
| positive                                                                                                                                                                                              | H   | 3.83   | severe-profound | Y   | Y    | N  | multiple              | N   | N  | Y                         | N                          |
| positive                                                                                                                                                                                              | H   | 3.25   | mild-moderate   | Y   | Y    | N  | multiple              | Y   | Y  | N                         | N                          |
| positive                                                                                                                                                                                              | H   | 5.00   | severe-profound | Y   | N    | Y  | multiple              | N   | N  | N                         | N                          |
| negative                                                                                                                                                                                              | H   | 5.33   | mild-moderate   | Y   | Y    | N  | multiple              | N   | N  | N                         | N                          |
| negative                                                                                                                                                                                              | F   | 5.17   | severe-profound | Y   | N    | N  | single                | N   | N  | N                         | N                          |
| negative                                                                                                                                                                                              | M   | 3.5    | mild-moderate   | Y   | N    | N  | single                | N   | N  | N                         | N                          |
| negative                                                                                                                                                                                              | F   | 7.58   | mild-moderate   | Y   | N    | N  | single                | N   | N  | N                         | N                          |
| negative                                                                                                                                                                                              | M   | 3.67   | mild-moderate   | Y   | N    | N  | single                | N   | N  | N                         | N                          |
| negative                                                                                                                                                                                              | M   | 3.42   | mild-moderate   | Y   | N    | N  | single                | N   | N  | N                         | N                          |
| negative                                                                                                                                                                                              | M   | 3.5    | mild-moderate   | Y   | N    | N  | single                | N   | N  | Y                         | N                          |
| negative                                                                                                                                                                                              | M   | 4.25   | mild-moderate   | Y   | N    | N  | single                | N   | N  | Y                         | Y                          |
| negative                                                                                                                                                                                              | M   | 6.75   | mild-moderate   | Y   | Y    | N  | multiple              | N   | N  | N                         | N                          |
| negative                                                                                                                                                                                              | M   | 14.5   | mild-moderate   | Y   | Y    | N  | multiple              | N   | N  | N                         | N                          |
| negative                                                                                                                                                                                              | H   | 3.42   | severe-profound | Y   | N    | N  | single                | N   | N  | N                         | Y                          |
| positive                                                                                                                                                                                              | M   | 4.83   | severe-profound | Y   | N    | Y  | multiple              | N   | Y  | N                         | Y                          |
| negative                                                                                                                                                                                              | F   | 3.92   | mild-moderate   | Y   | N    | N  | single                | N   | N  | Y                         | N                          |
| negative                                                                                                                                                                                              | M   | 5.17   | mild-moderate   | Y   | N    | N  | single                | N   | N  | N                         | N                          |
| negative                                                                                                                                                                                              | M   | 4.17   | mild-moderate   | Y   | N    | N  | single                | N   | N  | N                         | N                          |
| positive                                                                                                                                                                                              | F   | 4.17   | severe-profound | Y   | N    | N  | single                | Y   | Y  | N                         | Y                          |
| positive                                                                                                                                                                                              | F   | 1.5    | severe-profound | Y   | N    | N  | single                | Y   | Y  | N                         | N                          |
| negative                                                                                                                                                                                              | F   | 3.67   | mild-moderate   | Y   | N    | N  | single                | N   | N  | N                         | N                          |
| positive                                                                                                                                                                                              | F   | 7      | severe-profound | N   | N    | Y  | multiple              | Y   | Y  | N                         | N                          |
| negative                                                                                                                                                                                              | M   | 5.08   | mild-moderate   | N   | Y    | N  | single                | N   | N  | N                         | N                          |
| negative                                                                                                                                                                                              | M   | 1.67   | mild-moderate   | N   | N    | Y  | single                | N   | N  | N                         | N                          |
| negative                                                                                                                                                                                              | M   | 6.08   | mild-moderate   | N   | Y    | N  | single                | Y   | N  | N                         | N                          |
| negative                                                                                                                                                                                              | M   | 10     | mild-moderate   | N   | Y    | N  | single                | N   | N  | N                         | N                          |
| negative                                                                                                                                                                                              | M   | 1.7    | mild-moderate   | N   | Y    | N  | single                | N   | N  | N                         | Y                          |
| negative                                                                                                                                                                                              | M   | 4      | negative        | Y   | N    | Y  | single                | N   | Y  | N                         | N                          |
| positive                                                                                                                                                                                              | F   | 4.00   | mild-moderate   | Y   | N    | N  | single                | N   | N  | N                         | N                          |
| positive                                                                                                                                                                                              | F   | 1.66   | mild-moderate   | N   | N    | Y  | single                | N   | Y  | N                         | N                          |
| negative                                                                                                                                                                                              | M   | 2.83   | mild-moderate   | Y   | Y    | N  | single                | N   | N  | N                         | N                          |
| positive                                                                                                                                                                                              | M   | 4.33   | severe-profound | N   | N    | Y  | single                | N   | N  | N                         | N                          |
| positive                                                                                                                                                                                              | M   | 3.33   | mild-moderate   | Y   | N    | N  | single                | N   | Y  | N                         | N                          |
| negative                                                                                                                                                                                              | F   | 3.00   | mild-moderate   | Y   | N    | N  | single                | N   | Y  | N                         | N                          |
| positive                                                                                                                                                                                              | M   | 4.58   | severe-profound | N   | Y    | N  | single                | N   | N  | N                         | N                          |
| negative                                                                                                                                                                                              | M   | 3.25   | mild-moderate   | Y   | N    | N  | single                | N   | Y  | N                         | N                          |
| negative                                                                                                                                                                                              | F   | 1.56   | mild-moderate   | N   | N    | Y  | single                | N   | Y  | N                         | N                          |
| positive                                                                                                                                                                                              | M   | 6.00   | mild-moderate   | Y   | Y    | N  | single                | N   | Y  | N                         | N                          |
| negative                                                                                                                                                                                              | M   | 4.92   | mild-moderate   | N   | N    | N  | single                | N   | N  | N                         | N                          |
| negative                                                                                                                                                                                              | M   | 5.00   | mild-moderate   | Y   | Y    | N  | multiple              | N   | N  | N                         | N                          |

Abbreviations: s-NDDs= syndromic neurodevelopmental disorder; GDH ID, global developmental delay/intellectual disability; ASD, autism spectrum disorder; ADHD, attention deficit hyperactivity; EP, epilepsy; HCA, hand circumference abnormality; BM, brain malformation; Note: (1) M, male; F, female; (2) "Y" means "abnormality on this clinical assessment"; "N" means "no abnormality on this clinical assessment"; (3) "single" means "only coexisting one type of neurodevelopmental comorbidity (ASD or ADHD or EP) in s-NDDs individuals"; "multiple" means "coexisting two or three types of neurodevelopmental comorbidity (ASD or ADHD or EP) in s-NDDs individuals with pathogenic variants detected by sex-WES"; "negative" means patients with benign genetic significance variants detected by sex-WES.
